# Supplementary material
Source: publisher site journal article supplement (https://www.dovepress.com/article/505918)
Supplement: Supplementary file 1 [file get_supplementary_file.php]

**Injectable Nanocomposite Hydrogel for Accelerating Diabetic Wound Healing Through Inflammatory Microenvironment Regulation**

Yuhui Chen1,*, Ying Li1,*, Haoning Song1,*, Xiaochun Liu1, Hongan Zhang1, Jiaxin Jiang2, Hongsheng Liu2, Ribo Zhuo1, Guoyun Cheng1, Jia Fang1, Lei Xu1,, Yong Qi1, Dawei Sun1

1Department of Orthopedics and Traumatology, The Affiliated Guangdong Second Provincial General Hospital of Jinan University, Guangzhou, Guangdong, 510315, P.R. China

2Guangdong Huayi Biomedical Science and Technology Center, Guangzhou, Guangdong, 511450, P.R. China.

*These authors contributed equally to this work.

Corresponding authors.

Correspondence: Lei Xu, Department of Orthopedics and Traumatology, Guangdong Second Provincial General Hospital of Jinan University, Guangzhou, No.466 Xingang Middle Road, Haizhu District, Guangzhou, Guangdong, China, E-mail: [orthoxl@163.com](mailto:orthoxl@163.com)

Dawei Sun, Department of Orthopedics and Traumatology, Guangdong Second Provincial General Hospital of Jinan University, Guangzhou, No.466 Xingang Middle Road, Haizhu District, Guangzhou, Guangdong, China, E-mail: [sundw@gd2h.org.cn](mailto:sundw@gd2h.org.cn)

Tabel S1 Summary list of gelation temperatures of recently reported thermosensitive hydrogels

| Hydrogel name | Main component | Gelation temperature/℃ | Reference |
| --- | --- | --- | --- |
| MC/TA/Fe | Tannic acid, Methylcellulose, Fe3+ | 35-38 | 1 |
| PFNOCMC | Oxidized carboxymethyl cellulose, Aminated poloxamer 407 | 33 | 2 |
| β-ChNCs/MC | β-chitin nanocrystals, Methylcellulose | 17-38 | 3 |
| MC/HPMC/CHI | Methylcellulose, Hydroxypropyl methylcellulose, Chitosan | 39 | 4 |
| MC/CaP/CaPGO | Methylcellulose, Calcium phosphate, Graphene oxide | 5-20 | 5 |





Fig S1. Statistics of pore size of hydrogels in different groups.


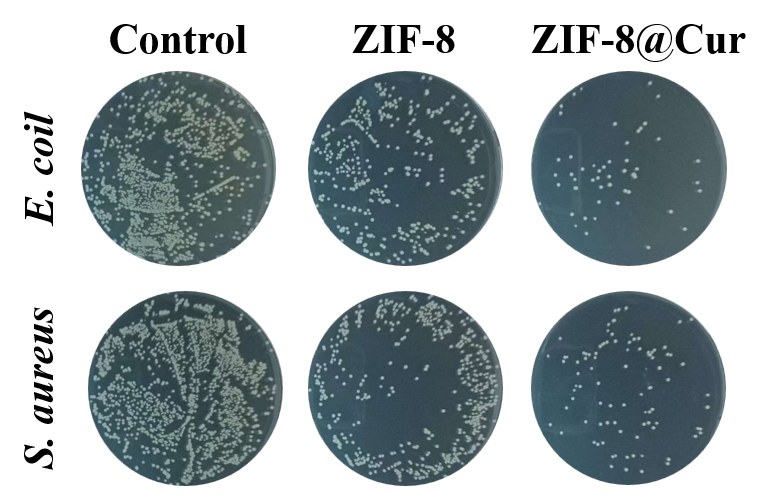


Fig S2. Optical images of *E. coli* and *S. aureus* colonies after 12 h of co-culture with different treatments.





Fig S3. Fluorescence intensity of H2O2 in HUVECs. Significance levels of ****p*<0.001 were applied.





Fig S4. Quantifiable statistics for tube length. Significance levels of **p*<0.05, ***p*<0.01 and ****p*<0.001 were applied.





Fig S5. Quantifiable statistics for branch points. Significance levels of ***p*<0.01 and ****p*<0.001 were applied.

1. Yeo Y H, Chathuranga K, Lee J S, Koo J, Park W H. Multifunctional and thermoresponsive methylcellulose composite hydrogels with photothermal effect, *Carbohydr. Polym.* 2022;277:118834.

2. Yang Y, Nan W, Zhang R, et al. Fabrication of carboxymethyl cellulose-based thermo-sensitive hydrogels and inhibition of corneal neovascularization, *Int. J. Biol. Macromol.* 2024;261:129933.

3. Jung H-S, Kim H C, Ho Park W. Robust methylcellulose hydrogels reinforced with chitin nanocrystals, *Carbohydr. Polym.* 2019;213:311-319.

4. dos Santos Carvalho J D, Rabelo R S, Hubinger M D. Thermo-rheological properties of chitosan hydrogels with hydroxypropyl methylcellulose and methylcellulose, *Int. J. Biol. Macromol.* 2022;209:367-375.

5. Bonetti L, Borsacchi S, Soriente A, et al. Injectable in situ gelling methylcellulose-based hydrogels for bone tissue regeneration, *Journal of Materials Chemistry B*. 2024;12(18):4427-4440.
